# Supplementary material for: Effectiveness of smoking cessation intervention based on the ABC Approach in patients with TB
Source: PubMed Central journal article supplement (PMC11216290; doi:10.5588/pha.23.0057), 2024-06-01
Supplement: iutld_pha_23.0057_supplementarydata1.pdf [file iutld_pha_23.0057_supplementarydata1.pdf]

## Effectiveness of smoking cessation intervention based on the ABC Approach in patients with TB

### Supplementary Table S1A Definition of A, B, and C used for the ABC

approach modified from reference 15 for the study

| Abbreviation | Modified definitions                                                                                                                                                                                                                                                                                                                                                                                                                                    |
|--------------|---------------------------------------------------------------------------------------------------------------------------------------------------------------------------------------------------------------------------------------------------------------------------------------------------------------------------------------------------------------------------------------------------------------------------------------------------------|
| A            | Ask about the smoking behaviour of TB patients and their family members via a face-to-face interview by health centre staff at each visit of the TB patients.                                                                                                                                                                                                                                                                                           |
| B            | Brief advice, which includes personalized and general information offered at the clinic by the health centre staff at each visit of the TB patients. General advice is provided to TB patients who are smokers and non-smokers. If their family members accompanied them, the family members receive similar advice. If not, we instructed TB patients to provide advice to their family members to maintain a secondhand smoke-free home.              |
| C            | Cessation support is provided along with brief advice at each visit of the TB patients. TB patients who smoke and are ready to quit smoking are advised to 1) tell family, friends, and colleagues that they are quitting smoking; 2) remove smoking accessories from home and workplaces; 3) make their home smoke-free and avoid secondhand smoke; and 4) be given health education leaflets, pamphlets, and “No Smoking” signage to display at home. |

**Supplementary Table S1B** Definition of terms used in this study, modified from reference 15

| <b>Terms</b>                            | <b>Definitions</b>                                                                                                                                                                                                                                 |
|-----------------------------------------|----------------------------------------------------------------------------------------------------------------------------------------------------------------------------------------------------------------------------------------------------|
| <b>Domestic secondhand-smoking free</b> | A house with no evidence of tobacco smoking at the home visit by the investigators.                                                                                                                                                                |
| <b>Non-smoker</b>                       | A patient who has never smoked tobacco (Never smoker) or who used to tobacco smoke but has not smoked in the last three months (Ex-smoker)                                                                                                         |
| <b>Never smoker</b>                     | A patient who has never smoked tobacco, not even a puff before.                                                                                                                                                                                    |
| <b>Ex-smoker</b>                        | A patient at enrolment who used to tobacco smoke but has not smoked in the last three months, not even a puff.                                                                                                                                     |
| <b>Current smoker</b>                   | 1) A patient at enrolment who has smoked in the last three months, even a puff or<br>2) A patient at follow-up visit who has smoked in the last two weeks, even a puff and has not attempted to quit (for at least 24 hours) since the last visit. |
| <b>Quitter</b>                          | A smoker who has quit tobacco temporarily or has remained to quit. The quitter is either a “Temporary quitter” or a “Staying quitter”.                                                                                                             |
| <b>Temporary quitter</b>                | A smoker who has quit tobacco for less than three months, including a smoker at baseline who has not smoked at all, even a puff, in the last two weeks at the follow-up visits.                                                                    |
| <b>Permanent quitter</b>                | A smoker who remained tobacco-free for three months or more.                                                                                                                                                                                       |
| <b>Relapsed</b>                         | A smoker at baseline who has tried to quit during the ABC intervention but has relapsed (has smoked in the last two weeks before the current visit but has made at least one quit attempt lasting at least 24 hours since the last visit).         |
| <b>Lost-to-follow-up</b>                | A patient with status who did not attend the follow-up visit.                                                                                                                                                                                      |
| <b>Died</b>                             | A patient who has died of any cause during anti-TB treatment.                                                                                                                                                                                      |

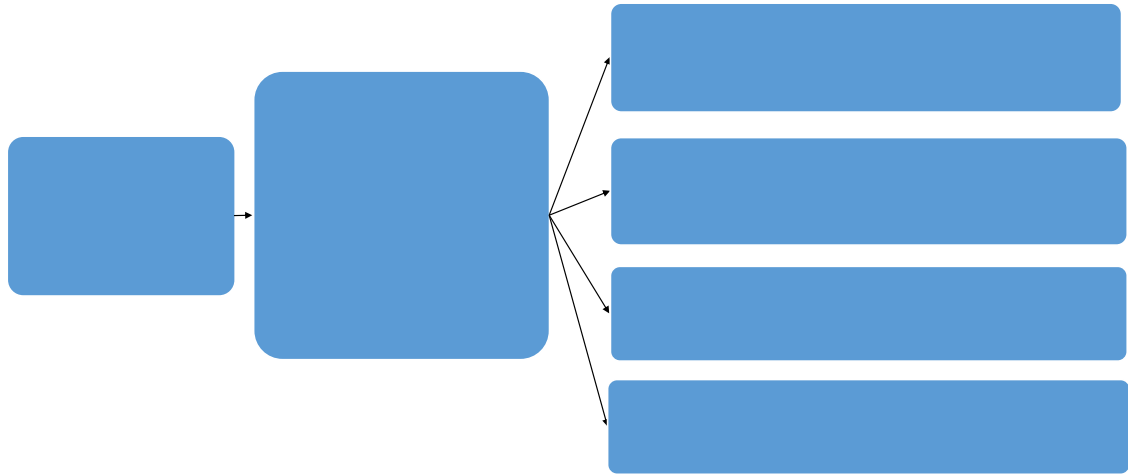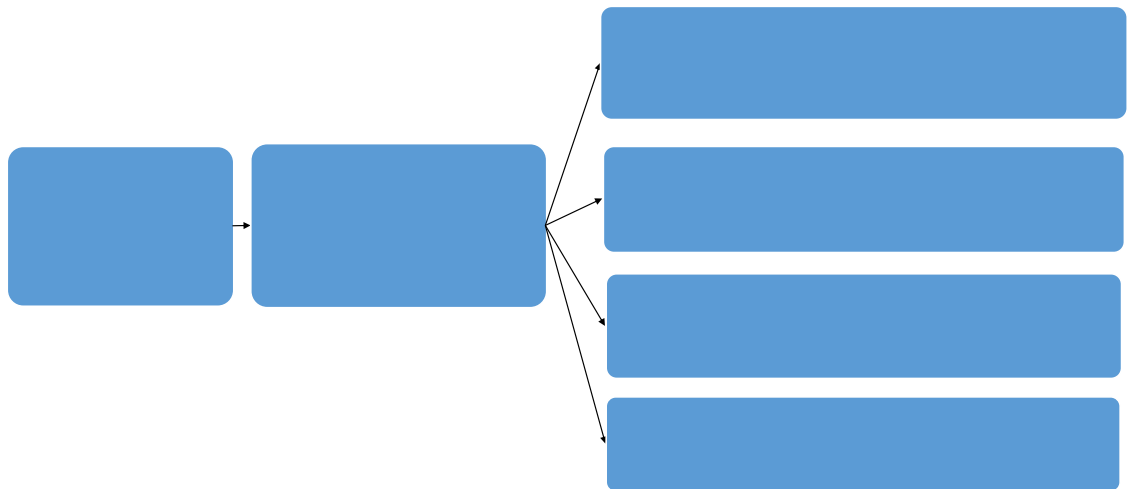

TB: tuberculosis

\*1 Tobacco-smoking status was classified as one of the categories of “never smoker”, “ex-smoker”, “current smoker”, “temporary quitter”, “staying quitter”, or “relapsed.”

\*2 Domestic secondhand-smoking status was defined as either secondhand smoke-free home or not.

\*3 TB treatment outcomes were defined following the National TB Control guidelines in the Philippines. TB treatment success was defined as either “cured” or “treatment completed.”

\*4 Post-TB treatment health status was self-reported as “well” or “unwell”.

**Supplementary Table S2** TB patient profiles enrolled in the study upon TB

registration, by the district in Manila, from 2017 to 2018, the Philippines, N=2,174

|                                      | Intervention district<br>(Group I) (District I,<br>Manila)<br>n=1,144 (%) | Control district<br>(Group C)<br>(District VI, Manila)<br>n=1,030 (%) | <i>p</i> -value<br>*5 |
|--------------------------------------|---------------------------------------------------------------------------|-----------------------------------------------------------------------|-----------------------|
| <b>Males</b>                         | 713 (62.3)                                                                | 645 (62.6)                                                            | 0.877                 |
| =< 10 cigarettes                     | 248 (68.9)                                                                | 191 (68.2)                                                            |                       |
| 11 – 20 cigarettes                   | 90 (25.0)                                                                 | 80 (28.6)                                                             |                       |
| 20 cigarettes <                      | 22 (6.1)                                                                  | 9 (3.2)                                                               |                       |
| <b>Age groups</b>                    |                                                                           |                                                                       | 0.987                 |
| 18-29 years old                      | 308 (26.9)                                                                | 277 (26.9)                                                            |                       |
| 30-49                                | 372 (32.5)                                                                | 335 (32.5)                                                            |                       |
| 50-69                                | 391 (34.2)                                                                | 356 (34.6)                                                            |                       |
| 70-                                  | 73 (6.4)                                                                  | 62 (6.0)                                                              |                       |
| <b>TB Patient category</b>           |                                                                           |                                                                       | 0.02                  |
| New                                  | 814 (71.2)                                                                | 778 (75.5)                                                            |                       |
| Retreatment                          | 253 (22.1)                                                                | 208 (20.2)                                                            |                       |
| others                               | 77 (6.7)                                                                  | 44 (4.3)                                                              |                       |
| <b>TB patient delay</b> *1           |                                                                           |                                                                       | <0.001                |
| 30 days or less                      | 445 (39.0)                                                                | 482 (47.5)                                                            |                       |
| 31 days or more                      | 697 (61.0)                                                                | 533 (52.5)                                                            |                       |
| <b>Symptoms upon TB registration</b> |                                                                           |                                                                       |                       |
| Cough                                | 951 (83.1)                                                                | 700 (68.0)                                                            | <0.001                |
| Fever                                | 208 (18.2)                                                                | 224 (21.8)                                                            | 0.037                 |
| Chest pain                           | 78 (6.8)                                                                  | 106 (10.3)                                                            | 0.139                 |
| Haemoptysis                          | 67 (5.9)                                                                  | 79 (7.7)                                                              | 0.092                 |
| Dyspnea                              | 79 (6.9)                                                                  | 70 (6.8)                                                              | 0.920                 |
| <b>Education History</b>             |                                                                           |                                                                       | 0.001                 |
| No formal education                  | 12 (1.1)                                                                  | 14 (1.4)                                                              |                       |

|                                                                                                                                      |            |            |        |
|--------------------------------------------------------------------------------------------------------------------------------------|------------|------------|--------|
| Elementary or secondary school level                                                                                                 | 894 (78.2) | 728 (70.7) |        |
| Post-secondary or college and above level                                                                                            | 226 (19.8) | 276 (26.8) |        |
| Others or unknown                                                                                                                    | 12 (1.1)   | 12 (1.2)   |        |
| <b>Marital status</b>                                                                                                                |            |            | 0.817  |
| Never married                                                                                                                        | 416 (36.4) | 371 (36.0) |        |
| Married or live together                                                                                                             | 594 (51.9) | 546 (53.0) |        |
| Widow/widower or separated/divorced                                                                                                  | 133 (11.6) | 111 (10.8) |        |
| Others or unknown                                                                                                                    | 1 (0.10)   | 2 (0.19)   |        |
| <b>Occupations</b>                                                                                                                   |            |            | 0.002  |
| Self-employed                                                                                                                        | 197 (17.2) | 114 (11.1) |        |
| Government employed                                                                                                                  | 40 (3.5)   | 40 (3.9)   |        |
| Private company employed                                                                                                             | 192 (16.8) | 167 (16.2) |        |
| Day laborer                                                                                                                          | 73 (6.4)   | 74 (7.2)   |        |
| Housekeeper                                                                                                                          | 17 (1.5)   | 30 (2.9)   |        |
| Unemployed                                                                                                                           | 519 (45.4) | 497 (48.3) |        |
| Student                                                                                                                              | 53 (4.6)   | 61 (5.9)   |        |
| Others or unknown                                                                                                                    | 53 (4.6)   | 47 (4.6)   |        |
| <b>Self-claimed regular home incomes <sup>*2</sup></b>                                                                               |            |            | 0.034  |
|                                                                                                                                      | 456 (40.0) | 365 (35.4) |        |
| <b>Self-claimed monthly household income <sup>*3</sup></b>                                                                           |            |            | <0.001 |
| <4,000 Philippines pesos (PP)                                                                                                        | 224 (19.6) | 109 (10.6) |        |
| 4,000 – 7,999 PP                                                                                                                     | 310 (27.1) | 254 (24.8) |        |
| 8,000 – 11,999 PP                                                                                                                    | 285 (24.9) | 274 (26.7) |        |
| 12,000 – 15,999 PP                                                                                                                   | 153 (13.4) | 176 (17.2) |        |
| >=16,000 PP                                                                                                                          | 172 (15.0) | 213 (20.8) |        |
| <b>Tobacco smoking dependency status among current smokers <sup>*4</sup> as the time until the first tobacco smoke after wake up</b> |            |            | 0.865  |

|                                                                                                                         |            |            |
|-------------------------------------------------------------------------------------------------------------------------|------------|------------|
| 30 minutes or less                                                                                                      | 118 (32.8) | 90 (32.1)  |
| More than 30 minutes                                                                                                    | 242 (67.2) | 190 (67.9) |
| <b>Tobacco smoking dependency status among current smokers</b> <sup>*4</sup> as the number of cigarettes smoked per day |            | 0.181      |
| =< 10 cigarettes                                                                                                        | 248 (68.9) | 191 (68.2) |
| 11 – 20 cigarettes                                                                                                      | 90 (25.0)  | 80 (28.6)  |
| 20 cigarettes <                                                                                                         | 22 (6.1)   | 9 (3.2)    |

TB: tuberculosis

\*1 17 patients were excluded due to missing data. Days between the onset of the TB symptoms and the first consultation with a health facility.

\*2 The number indicates the sum of participants who claimed “yes.”

\*3 Four patients were excluded due to missing data. One thousand pesos are equivalent to approximately 20 US Dollars.

\*4 One patient who was a current smoker in each of the Group I and Group C were excluded due to missing data.

\*5 The chi-square test was applied.

**Supplementary Table S3** Odds ratios of tobacco-smoking status with binominal

logistic regression analysis\* between the Intervention site (Group I) and Control site

(Group C) in Manila, by month of TB registration, from 2017 to 2018, the Philippines

|                    | Odds Ratio<br>(Intervention site vs. Control site) | 95% Confidence Interval |      | z-value | p-value | E-value        |                     |
|--------------------|----------------------------------------------------|-------------------------|------|---------|---------|----------------|---------------------|
|                    |                                                    | from                    | to   |         |         | Point estimate | Confidence Interval |
| Month 0 (n=2,153)  | 1.26                                               | 1.02                    | 1.55 | 2.15    | 0.032   | 1.49           | 1.11                |
| Month 2 (n=1,989)  | 0.43                                               | 0.30                    | 0.62 | -4.55   | <0.001  | 4.06           | 2.61                |
| Month 4 (n=1,936)  | 0.41                                               | 0.27                    | 0.62 | -4.26   | <0.001  | 4.32           | 2.62                |
| Month 6 (n=1,868)  | 0.45                                               | 0.30                    | 0.68 | -3.83   | <0.001  | 3.89           | 2.32                |
| Month 8 (n=1,643)  | 0.37                                               | 0.23                    | 0.58 | -4.25   | <0.001  | 4.88           | 2.82                |
| Month 12 (n=1,815) | 0.44                                               | 0.29                    | 0.66 | -3.93   | <0.001  | 3.95           | 2.38                |

TB: tuberculosis

Month 0: month at TB registration. Months 2 ~ 12: months from TB registration.

n: number of participants in the study each month from TB registration.

\* Binomial logistic regression analysis adjusted to the site, sex, age category, patient category, TB type, patient delay, education level, marital status, occupation, regular incomes, monthly household incomes, and HIV & DM status. Current smoking status, i.e., the dependent variable, was assigned as 1 if the participant was either a current smoker or relapsed; otherwise, non-smokers, quitters, ex-smokers, or unknown was assigned as 0.

**Supplementary Table S4** Odds ratios of tobacco-cessation status with binomial

logistic regression analysis\* between the Intervention site (Group I) and Control site

(Group C) in Manila, by month of TB registration, from 2017 to 2018, the Philippines

|                    | Odds Ratio<br>(Intervention<br>site vs.<br>Control site) | 95%<br>Confidence<br>Intervals |      | z-value | p-value | E-value           |                        |
|--------------------|----------------------------------------------------------|--------------------------------|------|---------|---------|-------------------|------------------------|
|                    |                                                          | from                           | to   |         |         | Point<br>estimate | Confidence<br>Interval |
| Month 2 (n=2,009)  | 1.92                                                     | 1.51                           | 2.45 | 5.30    | <0.001  | 2.12              | 1.76                   |
| Month 4 (n=1,959)  | 1.83                                                     | 1.44                           | 2.33 | 4.98    | <0.001  | 2.05              | 1.69                   |
| Month 6 (n=1,871)  | 1.97                                                     | 1.54                           | 2.52 | 5.44    | <0.001  | 2.16              | 1.79                   |
| Month 8 (n=1,669)  | 2.05                                                     | 1.58                           | 2.67 | 5.34    | <0.001  | 2.22              | 1.82                   |
| Month 12 (n=1,842) | 1.90                                                     | 1.49                           | 2.44 | 5.09    | <0.001  | 2.10              | 1.74                   |

TB: tuberculosis

Month 0: month at TB registration. Months 2 ~ 12: months from TB registration.

n: number of participants in the study each month from TB registration.

\* Binomial logistic regression analysis adjusted to the site, sex, age category, patient category, TB type, patient delay, education level, marital status, occupation, regular incomes, monthly household incomes, and HIV & DM status. Tobacco quitting status, i.e., the dependent variable, was assigned as one if the participant is a quitter; otherwise, current smokers, relapsed, non-smokers, ex-smokers, or unknown was assigned as 0.



**Supplementary Table S5A** Secondhand-smoking-at-home status (answered as yes)

of the TB patients enrolled by month of TB registration, by the site in Manila, from 2017 to 2018, the Philippines

|                    | Intervention site<br>(Group I)<br>(District I, Manila) | Control site<br>(Group C)<br>(District VI, Manila) | <i>p</i> -value<br>*1 |
|--------------------|--------------------------------------------------------|----------------------------------------------------|-----------------------|
| Month 0 (n=2,174)  | 461 (40.3%)                                            | 385 (37.4%)                                        | 0.163                 |
| Month 2 (n=2,096)  | 179 ( <u>16.3</u> )                                    | 233 (23.4)                                         | <0.001                |
| Month 4 (n=1,979)  | 180 ( <u>17.8</u> )                                    | 265 (27.4)                                         | <0.001                |
| Month 6 (n=1,967)  | 148 ( <u>14.5</u> )                                    | 229 (24.2)                                         | <0.001                |
| Month 8 (n=1,919)  | 107 ( <u>10.8</u> )                                    | 219 (23.6)                                         | <0.001                |
| Month 12 (n=1,878) | 105 ( <u>10.8</u> )                                    | 211 (23.3)                                         | <0.001                |

TB: tuberculosis

Month 0: month at TB registration. Months 2 ~ 12: months from TB registration.

\* Chi-square test was applied to test the statistically significant level of the proportions among the categories between the sites by month of TB registration.

**Supplementary Table S5B** Odds ratio of the secondhand-smoking-at-home status with logistic regression analysis\* between the Intervention site (Group I) and Control site (Group C) in Manila, by month of TB registration, from 2017 to 2018, the

| Philippines           | Odds Ratio<br>(Intervention<br>site vs.<br>Control site) | 95%<br>Confidence<br>Intervals |      | z-value | p-value | E-value           |                        |
|-----------------------|----------------------------------------------------------|--------------------------------|------|---------|---------|-------------------|------------------------|
|                       |                                                          | from                           | to   |         |         | Point<br>estimate | Confidence<br>Interval |
| Month 0<br>(n=2,153)  | 1.11                                                     | 0.93                           | 1.34 | 1.16    | 0.247   | 1.30              | 1.00                   |
| Month 2<br>(n=2,012)  | 0.71                                                     | 0.57                           | 0.90 | -2.87   | 0.004   | 1.65              | 1.30                   |
| Month 4<br>(n=1,959)  | 0.63                                                     | 0.51                           | 0.80 | -3.96   | <0.001  | 1.82              | 1.49                   |
| Month 6<br>(n=1,871)  | 0.62                                                     | 0.48                           | 0.79 | -3.92   | <0.001  | 1.86              | 1.51                   |
| Month 8<br>(n=1,669)  | 0.65                                                     | 0.49                           | 0.85 | -3.18   | 0.001   | 1.80              | 1.40                   |
| Month 12<br>(n=1,841) | 0.44                                                     | 0.34                           | 0.57 | -6.07   | <0.001  | 2.39              | 1.97                   |

TB: tuberculosis

Month 0: month at TB registration. Months 2 ~ 12: months from TB registration.

n: number of participants at each month from TB registration.

\* Logistic regression analysis adjusted to the site, sex, age category, patient category, TB type, patient delay, education level, marital status, occupation, regular incomes, monthly household incomes, and HIV & DM status. Secondhand smoking status, i.e., the dependent variable, was assigned as one if assessed as secondhand-smoking at home, otherwise was assigned as 0.

**Supplementary Table S6A** TB treatment outcomes with binominal logistic regression analysis\* by sites in Manila, TB patients registered from 2017 to 2018, the Philippines

|                                              | Intervention site<br>(District I, Manila) | Control site<br>(District VI, Manila) | <i>p</i> -value * |
|----------------------------------------------|-------------------------------------------|---------------------------------------|-------------------|
| <b>TB Treatment Outcomes<br/>(n = 2,246)</b> |                                           |                                       | 0.201             |
| Successful (cured or<br>treatment completed) | 993 (85.0)                                | 941 (87.3)                            |                   |
| Died                                         | 46 (3.9)                                  | 28 (2.6)                              |                   |
| Failed                                       | 8 (0.7)                                   | 6 (0.6)                               |                   |
| Lost to follow-up                            | 101 (8.7)                                 | 78 (7.2)                              |                   |
| Not Evaluated / unknown                      | 20 (1.7)                                  | 25 (2.3)                              |                   |

TB: tuberculosis

Months 12: months 12 from TB registration.

n: number available for TB treatment Outcome.

\* We applied the chi-square test to test the statistically significant level of the proportions among the categories between the sites.

**Supplementary Table S6B** Odds ratios of TB treatment success with logistic

regression analysis<sup>\*1</sup> by sites in Manila, TB patients registered from 2017 to 2018,

| the Philippines                                    | Odds Ratio<br>(Intervention<br>site vs. Control<br>site) | 95%<br>Confidence<br>Intervals |      | z-value | p-value | E-value           |                        |
|----------------------------------------------------|----------------------------------------------------------|--------------------------------|------|---------|---------|-------------------|------------------------|
|                                                    |                                                          | from                           | to   |         |         | Point<br>estimate | Confidence<br>Interval |
| TB Treatment<br>Success <sup>*2</sup><br>(n=2,195) | 1.10                                                     | 0.85                           | 1.42 | 0.71    | 0.477   | 1.27              | 1.00                   |

TB: tuberculosis

Months 12: months 12 from TB registration.

n: number available for TB treatment Outcome.

<sup>\*1</sup> Binominal logistic regression analysis adjusted to the site, sex, age category, patient category, TB type, patient delay, education level, marital status, occupation, regular incomes, monthly household incomes, and HIV & DM status.

<sup>\*2</sup> TB Treatment Success, i.e., the dependent variable, was assigned 1 if the outcome was either cured or treatment completed; otherwise, it was assigned 0.
